# Supplementary material
Source: HighWire-hosted journal article supplement (https://srh.bmj.com/highwire/filestream/141697/field_highwire_adjunct_files/0/bmjsrh-2021-201062supp001_data_supplement.pdf)
Supplement: bmjsrh-2021-201062supp001_data_supplement.pdf [file bmjsrh-2021-201062supp001_data_supplement.pdf]

**SUPPLEMENTARY MATERIAL**

Supplementary Material A. Survey.

**1 GENERAL PATIENT INFORMATION**

---

**1.1 AGE:** \_\_\_\_\_**1.2 SEX:**☐ Male ☐ Female ☐ Other: \_\_\_\_\_**1.3 RELATIONSHIP STATUS**☐ Single ☐ Engaged ☐ Married ☐ Living together ☐ Open ☐ Undefined**1.4 HIGHEST LEVEL OF EDUCATION**☐ Elementary school ☐ Some middle school ☐ Middle school ☐ Some high school  
☐ High school ☐ Some college ☐ College ☐ Graduate degree or beyond**1.5 RACE**☐ American-Indian/Alaskan Native ☐ Asian ☐ Black/African-American  
☐ Native Hawaiian/Other Pacific Islander ☐ White ☐ Other \_\_\_\_\_**1.6 ETHNICITY**☐ Hispanic or Latino(a) ☐ Non-Hispanic or Latino(a)**1.7 INSURANCE STATUS**☐ Private – Self-Pay ☐ Private - Employer ☐ Medicare/Medicaid ☐ Uninsured ☐ Other  
\_\_\_\_\_**1.8 YEARLY FAMILY INCOME:**☐ Under 20,000 ☐ \$20,000 - \$29,000 ☐ \$30,000 - \$39,000  
☐ \$40,000 - \$49,000 ☐ \$50,000 - \$59,000 ☐ \$60,000 or more**1.9 CHILDREN****1.9.1 Number of total children:** \_\_\_\_\_**1.9.2 Number with current partner:** \_\_\_\_\_**1.9.3 Do you desire more children:** ☐ Yes ☐ No ☐ not sure

1.9.4 Number of additional children desired: \_\_\_\_\_

## 2 VASECTOMY INFORMATION

---

### 2.1 AWARENESS

2.1.1 Has any healthcare provider (doctor, nurse, physician's assistant, etc) ever talked to you about a tubal ligation or a vasectomy?

☐ Yes – tubal ligation    ☐ No – tubal ligation    ☐ Yes – vasectomy    ☐ No – vasectomy

2.1.2 Some men have procedures that make it impossible for them to father a child. Have you heard of a "Vasectomy" before?

☐ Yes | ☐ No

2.1.3 Do you know anyone who has had a vasectomy, or other procedure like this?

☐ Yes | ☐ No | ☐ Not sure

2.1.4 Have you or your partner ever tried to obtain a vasectomy?

☐ Yes | ☐ No

2.1.5 Some women have procedures that make it impossible for them to have a child. Have you heard of a "Tubal Ligation" before? This is also known as "Tying (or cutting/removing) your tubes".

☐ Yes | ☐ No

2.1.6 Do you know anyone who has had a tubal ligation, or has "tied, cut or removed" her tubes?

☐ Yes | ☐ No | ☐ Not sure

2.1.7 Have you or your partner ever tried to obtain a tubal ligation?

☐ Yes | ☐ No

### 2.2 INTEREST AND ACCESS

2.2.1 Once you do not want any more children, how interested are you in obtaining a vasectomy (for yourself or your partner):

Not interested at all – Will never get it    ☐    ☐    ☐ (not sure)    ☐    Very interested – Will definitely get it

2.2.2 Who would you ask for more information about vasectomies?

☐ Primary care doctor    ☐ OB/prenatal doctor    ☐ Family doctor    ☐ Urgent care clinic  
☐ Urologist doctor    ☐ Family or friends    ☐ Other: \_\_\_\_\_

2.2.3 Where would you go to get a vasectomy?

☐ Emergency room    ☐ Primary care clinic    ☐ Family doctor clinic    ☐ Urgent care clinic  
☐ OB/prenatal office    ☐ Urologist office    ☐ Other: \_\_\_\_\_

2.2.4 Do you think a vasectomy will be covered by your insurance?

☐ Yes | ☐ No | ☐ Not sure

**2.2.5 If vasectomies were not covered by your insurance, how much would you pay out of pocket for it?**

☐ I would not get it if it was not covered by insurance ☐ I would not be interested in a vasectomy

☐ < \$50 ☐ \$50 - \$100 ☐ \$100 - \$200  
☐ \$200 - \$500 ☐ \$500 - \$1000 ☐ >\$1000

**2.2.6 Once you do not want any more children, how interested are you in obtaining a tubal ligation (for yourself or your partner):**

Not interested at all – Will ☐ ☐ ☐ (not sure) ☐ ☐ Very interested – Will definitely get it  
never get it

**2.2.7 Do you think a tubal ligation will be covered by your insurance?**

☐ Yes | ☐ No | ☐ Not sure

**2.2.8 If tubal ligations were not covered by your insurance, how much would you pay out of pocket for it?**

☐ I would not get it if it was not covered by insurance ☐ I would not be interested in a tubal ligation

☐ < \$50 ☐ \$50 - \$100 ☐ \$100 - \$200  
☐ \$200 - \$500 ☐ \$500 - \$1000 ☐ >\$1000

**2.3 OTHER****2.3.1 What are reasons why a man would not want to have a vasectomy?**

☐ Costs too much ☐ Affects his sex life/ability to orgasm ☐ Makes him less of a man  
☐ Cannot take time off ☐ Would not know where to get it ☐ Against his religion or culture  
☐ Fear ☐ Would regret it in the future ☐ Would not work  
☐ Cancer risk ☐ Not sure ☐ Other:

**2.3.2 Who should be responsible for family planning, or deciding the number of children a family has?**

☐ The woman ☐ The man ☐ Both ☐ Not sure

**2.3.3 Which procedure for not having more children has a higher risk?**

☐ Tying the woman's tubes – Tubal ligation ☐ Male vasectomy ☐ They are both about the same  
☐ Unsure

**2.4 ANYTHING ELSE?**

---

---

---

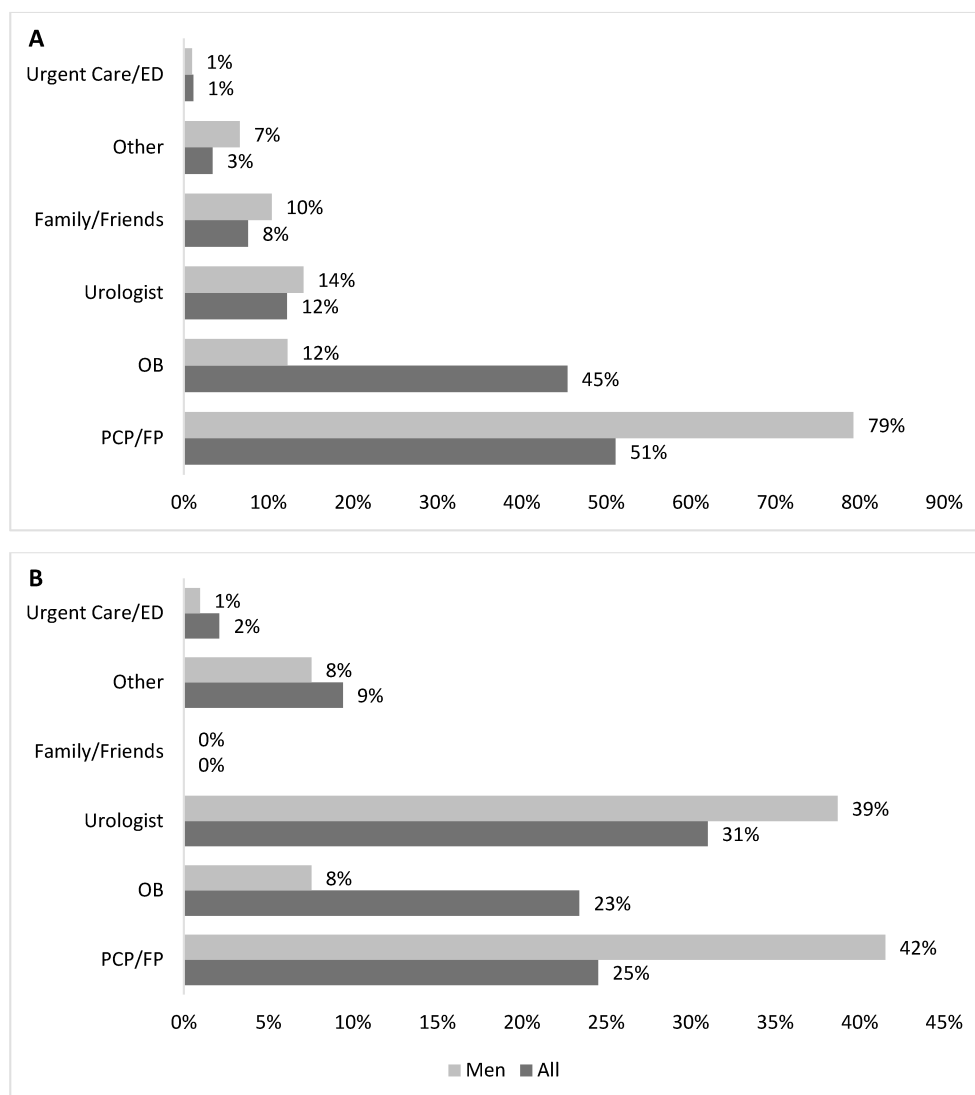

**Supplementary Material Figure 1.** Where one would obtain more information about vasectomies (A) or obtain the vasectomy procedure itself (B) for all respondents (N= 436) and men only (N=106). Respondents may select more than one answer. PCP = Primary care provider; FP = Family practitioner; OB = Obstetrician's office; ED = Emergency department.

**Supplementary Material Table 1.** Sensitivity analysis for interest in obtaining a vasectomy in subjects who have heard of a vasectomy after excluding “unsure” responses. Outcomes dichotomized as somewhat to very interested versus somewhat to not interested (N=204). Adjusted analyses controlled for age, gender, education, income, relationship status, insurance, and race; participants missing any information on covariates were excluded.

|                     |                                       | Unadjusted         | P-value | Adjusted           | P-value |
|---------------------|---------------------------------------|--------------------|---------|--------------------|---------|
|                     |                                       | OR (95% CI)        |         | aOR (95% CI)       |         |
| <b>Hospital</b>     | PR vs PU                              | 2.96 (1.23 - 7.10) | 0.015   | 0.80 (0.12 - 5.31) | 0.818   |
| <b>Age</b>          |                                       | 1.07 (1.01 - 1.14) | 0.023   | 1.03 (0.95 - 1.12) | 0.510   |
| <b>Sex</b>          | Female vs Male                        | 0.91 (0.45 - 1.84) | 0.798   | 1.15 (0.50 - 2.68) | 0.738   |
| <b>Relationship</b> | Partnered vs Single                   | 13.7 (2.93 - 64.3) | 0.001   | 20.9 (1.88 - 232)  | 0.014   |
| <b>Education</b>    | College graduate vs Less than college | 1.76 (0.81 - 3.81) | 0.153   | 0.82 (0.23 - 2.89) | 0.756   |
| <b>Race</b>         | White vs Non-white                    | 3.16 (1.63 - 6.13) | <0.001  | 2.47 (1.07 - 5.71) | 0.034   |
| <b>Ethnicity</b>    | Non-Hispanic vs Hispanic              | 2.16 (1.03 - 4.52) | 0.042   | 0.92 (0.26 - 3.31) | 0.897   |
| <b>Insurance</b>    | Employer vs Non-employer              | 2.33 (1.12 - 4.84) | 0.024   | 1.08 (0.31 - 3.80) | 0.902   |
| <b>Income</b>       | <=60k vs >60k                         | 0.70 (0.33 - 1.39) | 0.354   | 2.00 (0.54 - 7.47) | 0.301   |
| <b>Counsel*</b>     | Yes vs No                             | 0.50 (0.11 - 2.40) | 0.389   | 0.35 (0.04 - 2.79) | 0.322   |
| <b>Exposure*</b>    | Yes vs None                           | 6.51 (3.14 - 13.5) | <0.001  | 8.43 (3.03 - 23.5) | <0.001  |

\*Counsel: Whether a provider has talked to the participant about vasectomy. Exposure: Whether a participant knows someone who has had a vasectomy
